# Supplementary material for: Association of Household Food Insecurity With Dietary Intakes and Nutrition-Related Knowledge, Attitudes, and Practices Among School-Aged Children in Gaza Strip, Palestine
Source: Frontiers journal article supplement (doi:10.3389/fnut.2022.890850), 2022-06-29
Supplement: Data_Sheet_1.PDF [file Data_Sheet_1.PDF]

### Radimer / Cornell Hunger and Food Insecurity Items

| No.                                | Question                                                                                                                                                              | Not True | Sometimes True | Always True |
|------------------------------------|-----------------------------------------------------------------------------------------------------------------------------------------------------------------------|----------|----------------|-------------|
| <b>A. Household level</b>          |                                                                                                                                                                       |          |                |             |
| 1.                                 | I worry that if the food or raw materials for cooking will run out before I could have more money to buy food.                                                        |          |                |             |
| 2.                                 | Food or raw materials for cooking that I bought for my family at home is always run out fast and I do not have the money to buy food again.                           |          |                |             |
| 3.                                 | I do not have enough food or raw materials to cook or prepare a family meal (for the tomb of the morning, noon or night) and I did not have enough money to buy food. |          |                |             |
| 4.                                 | We eat the same thing for several days in a row because we only have a few different kinds of food on hand and do not have money to buy more.                         |          |                |             |
| <b>B. Individual level (Adult)</b> |                                                                                                                                                                       |          |                |             |
| 5.                                 | I am often hungry but I do not eat because I do not have enough money to buy food.                                                                                    |          |                |             |
| 6.                                 | I only eat a little of what I should eat because I do not have enough money to buy food.                                                                              |          |                |             |
| 7.                                 | I was not able to eat properly or eat to satiety because I do not have enough money to buy food.                                                                      |          |                |             |
| <b>C. Individual level (Child)</b> |                                                                                                                                                                       |          |                |             |
| 8.                                 | I am not able to provide a balanced meal to my children because I do not have enough money to provide food.                                                           |          |                |             |
| 9.                                 | My children do not eat enough or always lack of food because I am not able to buy enough food.                                                                        |          |                |             |
| 10.                                | I know sometimes my children are hungry, but I cannot do anything because I am not able to buy food in excess of what I always buy                                    |          |                |             |

| Socio-demographic characteristics for school-aged children (5-18 years old) |                                             |                                                                                                                                                                           |
|-----------------------------------------------------------------------------|---------------------------------------------|---------------------------------------------------------------------------------------------------------------------------------------------------------------------------|
| 1.                                                                          | Child name                                  | .....                                                                                                                                                                     |
| 2.                                                                          | Sex                                         | <input type="checkbox"/> Male <input type="checkbox"/> Female                                                                                                             |
| 3.                                                                          | Age (years)                                 | .....                                                                                                                                                                     |
| 4.                                                                          | Governorate                                 | <input type="checkbox"/> North Gaza <input type="checkbox"/> Gaza <input type="checkbox"/> Middle Area <input type="checkbox"/> Khan Yunis <input type="checkbox"/> Rafah |
| 5.                                                                          | Where do you live?                          | <input type="checkbox"/> City <input type="checkbox"/> Village <input type="checkbox"/> Refugees camp                                                                     |
| 6.                                                                          | Educational level of the head of households | <input type="checkbox"/> Illiterate <input type="checkbox"/> Primary <input type="checkbox"/> Pr <input type="checkbox"/> Secondary <input type="checkbox"/> University   |
| 7.                                                                          | Family income (NIS)                         | .....                                                                                                                                                                     |

| Anthropometric measures |                                  |       |
|-------------------------|----------------------------------|-------|
| 1.                      | Height (cm)                      | ..... |
| 2.                      | Weight (kg)                      | ..... |
| 3.                      | Mid Upper Arm Circumference (cm) | ..... |

| KAP about: Diet of school-aged children (5-18 years old)                                                                                                                                                                                                 |  |
|----------------------------------------------------------------------------------------------------------------------------------------------------------------------------------------------------------------------------------------------------------|--|
| <b>Knowledge</b>                                                                                                                                                                                                                                         |  |
| 1. What problems can children have if they do not eat before going to school?                                                                                                                                                                            |  |
| <input type="checkbox"/> Children have short attention/have low concentration/cannot study well/do not do as well at school as they should<br><input type="checkbox"/> Other <input type="checkbox"/> Don't know                                         |  |
| 2. Why is it so bad to eat too many sweets and candies?                                                                                                                                                                                                  |  |
| <input type="checkbox"/> Because they can cause tooth decay <input type="checkbox"/> Because they are not nutritious <input type="checkbox"/> Because they interfere with appetite<br><input type="checkbox"/> Other <input type="checkbox"/> Don't know |  |
| <b>Attitudes</b>                                                                                                                                                                                                                                         |  |

|                                                                                  |                                          |                                    |
|----------------------------------------------------------------------------------|------------------------------------------|------------------------------------|
| <b>3. How good do you think it is to have breakfast before going to school?</b>  |                                          |                                    |
| <input type="checkbox"/> Not good                                                | <input type="checkbox"/> You're not sure | <input type="checkbox"/> Good      |
| <b>4. How difficult is it for you to have breakfast before going to school?</b>  |                                          |                                    |
| <input type="checkbox"/> Not difficult                                           | <input type="checkbox"/> So-so           | <input type="checkbox"/> Difficult |
| <b>5. How good do you think it is to have three meals a day and snacks?</b>      |                                          |                                    |
| <input type="checkbox"/> Not good                                                | <input type="checkbox"/> You're not sure | <input type="checkbox"/> Good      |
| <b>6. How difficult is it for you to have three meals a day and snacks?</b>      |                                          |                                    |
| <input type="checkbox"/> Not difficult                                           | <input type="checkbox"/> So-so           | <input type="checkbox"/> Difficult |
| <b>7. How good do you think it is to have different types of foods at meals?</b> |                                          |                                    |
| <input type="checkbox"/> Not good                                                | <input type="checkbox"/> You're not sure | <input type="checkbox"/> Good      |
| <b>8. How difficult is it for you to have different types of foods at meals?</b> |                                          |                                    |
| <input type="checkbox"/> Not difficult                                           | <input type="checkbox"/> So-so           | <input type="checkbox"/> Difficult |

|                                                                                                                                                                                         |                                                  |                                                   |
|-----------------------------------------------------------------------------------------------------------------------------------------------------------------------------------------|--------------------------------------------------|---------------------------------------------------|
| <b>Practices</b>                                                                                                                                                                        |                                                  |                                                   |
| <b>9. Did you have breakfast before going to school?</b>                                                                                                                                |                                                  |                                                   |
| <input type="checkbox"/> Yes                                                                                                                                                            | <input type="checkbox"/> No                      | <input type="checkbox"/> Don't know/no answer     |
| <b>10. If Yes: At what time?</b>                                                                                                                                                        |                                                  |                                                   |
| <input type="checkbox"/> Between 6 a.m. and 9 a.m                                                                                                                                       | <input type="checkbox"/> Between 9 a.m. and noon | <input type="checkbox"/> Between noon and 3 p.m   |
| <b>11. Where?</b>                                                                                                                                                                       |                                                  |                                                   |
| <input type="checkbox"/> Home                                                                                                                                                           | <input type="checkbox"/> School                  | <input type="checkbox"/> Elsewhere                |
| <b>12. If the interview is being conducted before lunchtime, ask: Did you have lunch yesterday? If the interview is being conducted after lunchtime, ask: Did you have lunch today?</b> |                                                  |                                                   |
| <input type="checkbox"/> Yes                                                                                                                                                            | <input type="checkbox"/> No                      | <input type="checkbox"/> Don't know/no answer     |
| <b>13. If Yes: At what time?</b>                                                                                                                                                        |                                                  |                                                   |
| <input type="checkbox"/> Between 9 a.m. and noon                                                                                                                                        | <input type="checkbox"/> Between noon and 3 p.m  | <input type="checkbox"/> Between 3 p.m. and 6 p.m |

|                                                                                        |                                                              |                                                      |
|----------------------------------------------------------------------------------------|--------------------------------------------------------------|------------------------------------------------------|
| <b>14. Who prepares your lunch?</b>                                                    |                                                              |                                                      |
| <input type="checkbox"/> Parents at home                                               | <input type="checkbox"/> School cafeteria                    |                                                      |
| <input type="checkbox"/> Lunch is bought with pocket money                             | <input type="checkbox"/> Other                               |                                                      |
| <b>15. Did you have dinner yesterday?</b>                                              |                                                              |                                                      |
| <input type="checkbox"/> Yes                                                           | <input type="checkbox"/> No                                  | <input type="checkbox"/> Don't know/no answer        |
| <b>16. If Yes: At what time?</b>                                                       |                                                              |                                                      |
| <input type="checkbox"/> Between 3 p.m. and 6 p.m                                      | <input type="checkbox"/> Between 6 p.m. and 9 p.m            | <input type="checkbox"/> Between 9 p.m. and midnight |
| <b>17. Where?</b>                                                                      |                                                              |                                                      |
| <input type="checkbox"/> Home                                                          | <input type="checkbox"/> School                              | <input type="checkbox"/> Elsewhere                   |
| <b>18. Yesterday during the day and night, did you eat anything between the meals?</b> |                                                              |                                                      |
| <input type="checkbox"/> Yes                                                           | <input type="checkbox"/> No                                  | <input type="checkbox"/> Don't know/no answer        |
| <b>19. Yesterday during the day and night, did you buy foods with your own money?</b>  |                                                              |                                                      |
| <input type="checkbox"/> Yes                                                           | <input type="checkbox"/> No                                  | <input type="checkbox"/> Don't know/no answer        |
| <b>20. Where did you buy those foods?</b>                                              |                                                              |                                                      |
| <input type="checkbox"/> At school/cafeteria                                           | <input type="checkbox"/> On the street (from street vendors) | <input type="checkbox"/> Other                       |
